# Supplementary material for: Antioxidant and anti-inflammatory activity of a flavonoid-rich concentrate recovered from Opuntia ficus-indica juice
Source: Royal Society of Chemistry journal article supplement (doi:10.1039/c4fo00071d), 2014-01-01
Supplement: c4fo00071d1.pdf [file c4fo00071d1.pdf]

## Supporting Information

### Methods and procedures

#### MS Scan ESI

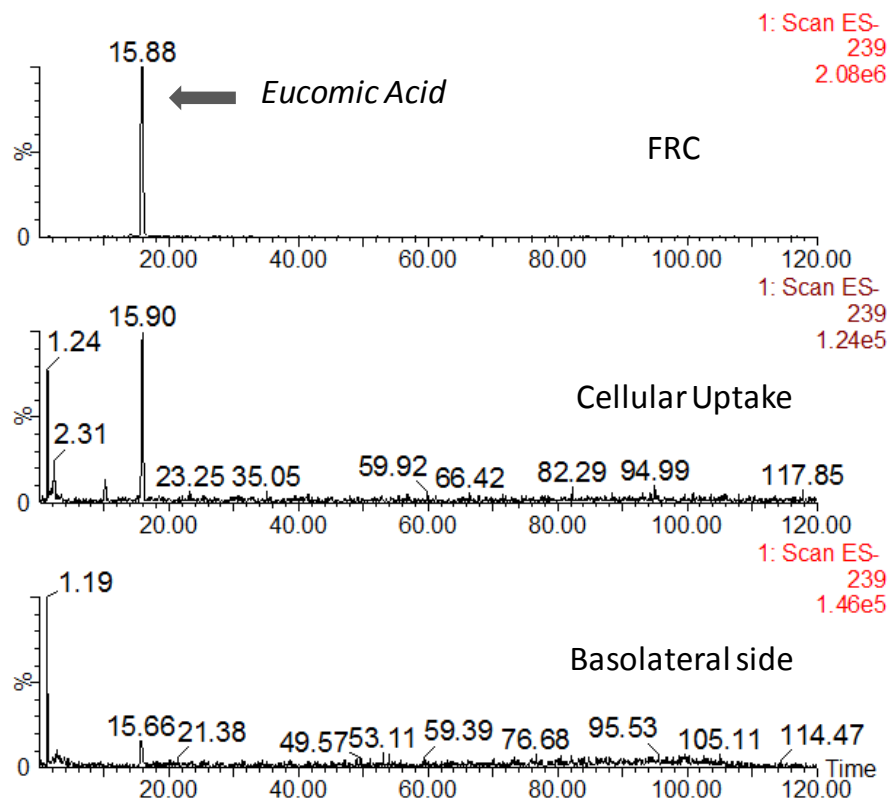

Figure S1 - Chromatograms from the analysis of FRC, solutions of cellular uptake and transepithelial transport (basolateral side) at m/z 239 (Eucomic acid).

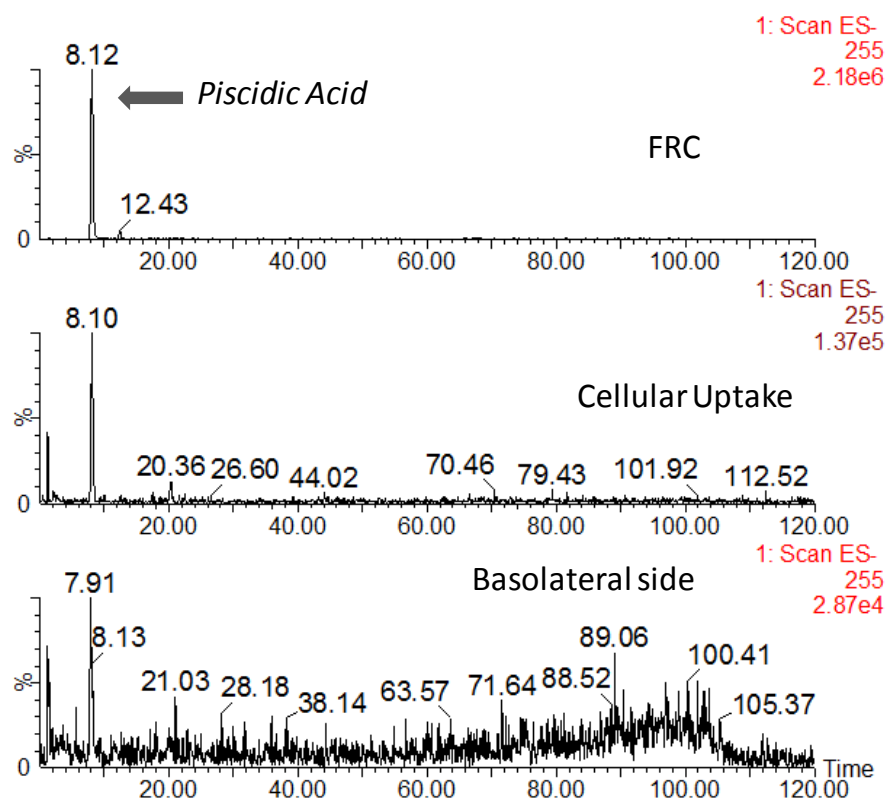

Figure S2 - Chromatograms from the analysis of FRC, solutions of cellular uptake and transepithelial transport (basolateral side) at m/z 255 (Piscidic acid).

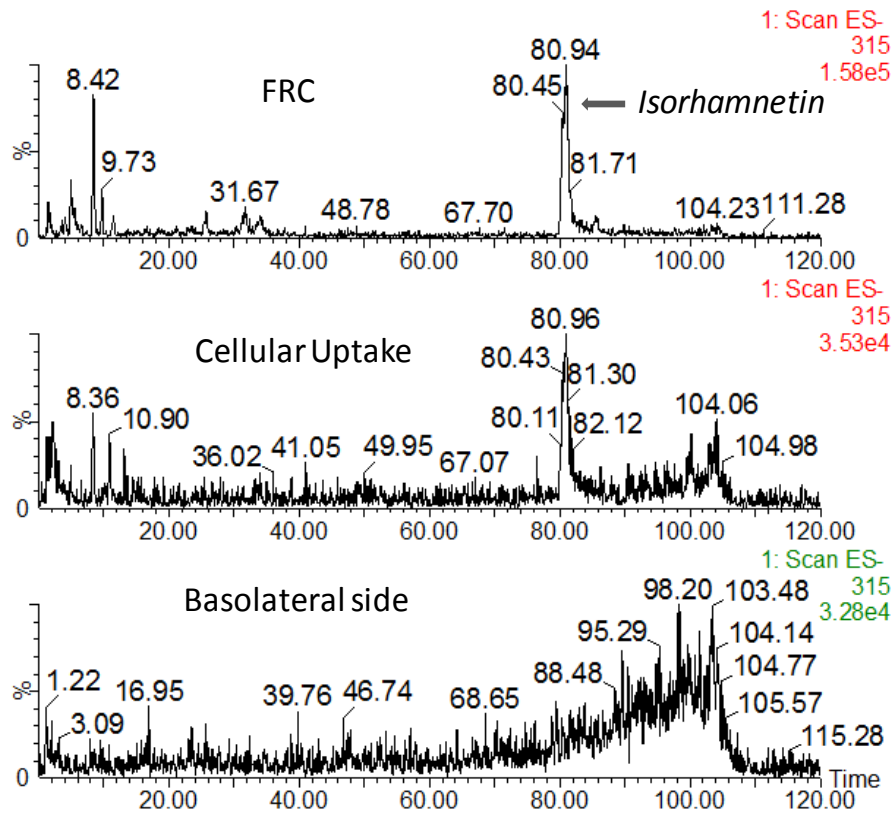

Figure S3 - Chromatograms from the analysis of FRC, solutions of cellular uptake and transepithelial transport (basolateral side) at m/z 315 (Isorhamnetin).
